# **A Reaction-Diffusion Network model predicts a dual role of Cactus/I $\kappa$ B to regulate Dorsal/NF $\kappa$ B nuclear translocation in *Drosophila***

<sup>1</sup>Barros, C.D.T., <sup>2,3</sup>Cardoso, M.A., <sup>2</sup>Bisch, P.M., <sup>3,\*</sup>Araujo, H.M., <sup>4,\*</sup>Lopes, F.J.P.

<sup>1</sup> Laboratório Nacional de Computação Científica (LNCC), Petrópolis, Brasil.

<sup>2</sup> Laboratório de Física Biológica, Instituto de Biofísica Carlos Chagas Filho (IBCCF),  
Universidade Federal do Rio de Janeiro (UFRJ) - Rio de Janeiro, Brasil

<sup>3</sup> Laboratório de Biologia Molecular do Desenvolvimento, Instituto de Ciências Biomédicas,  
Universidade Federal do Rio de Janeiro (UFRJ), Centro de Ciências da Saúde - Rio de  
Janeiro, Brasil

<sup>4</sup> Grupo de Biologia do Desenvolvimento e Sistemas Dinâmicos, Campus Duque de Caxias  
Professor Geraldo Cidade, Universidade Federal do Rio de Janeiro (UFRJ) – Duque de  
Caxias, Brasil

\* corresponding authors (haraújo@histo.ufrj.br; flopes@ufrj.br)

**Keywords:** NF $\kappa$ B, Dorsal gradient, morphogen, mathematical model, Toll

**Running title:** Cactus reaction-diffusion network

# ABSTRACT

Dorsal-ventral patterning of the *Drosophila* embryo depends on the NFκB superfamily transcription factor Dorsal (DI). Toll receptor activation signals for degradation of the IκB inhibitor Cactus (Cact), leading to a ventral-to-dorsal nuclear DI gradient. Cact is critical for DI nuclear import, as it binds to and prevents DI from entering the nuclei. Quantitative analysis of *cact* mutants revealed an additional Cact function to promote DI nuclear translocation in ventral regions of the embryo. To investigate this dual Cact role, we developed a predictive model based on a reaction-diffusion regulatory network. This network considers non-uniform Toll activation as well as Toll-dependent DI nuclear import and Cact degradation. In addition, it incorporates translational control of Cact levels by DI, a Toll-independent pathway for Cact regulation and reversible nuclear-cytoplasmic DI flow. Our model successfully reproduces wild-type data and emulates the DI nuclear gradient in mutant *dl* and *cact* allelic combinations. Our results indicate that the dual role of Cact depends on targeting distinct DI complexes along the dorsal-ventral axis: In the absence of Toll activation, free DI-Cact trimers inhibit direct DI nuclear entry; upon ventral-lateral Toll activation, DI-Cact trimers are recruited into predominant signaling complexes and promote active DI nuclear translocation. Simulations suggest that Toll-independent regulatory mechanisms that target Cact are fundamental to reproduce the full assortment of Cact effects. Considering the high evolutionary conservation of these pathways, our analysis should contribute to understand NFκB/c-Rel activation in other contexts such as in the vertebrate immune system and disease.

# INTRODUCTION

In a developing organism, tissues are often patterned by long-range and spatially graded signaling factors called morphogens, which carry the positional information necessary to control gene expression. Morphogens act in a concentration-dependent manner to activate or repress target genes (Driever and Nusslein-Volhard, 1988; Lopes *et al.*, 2008; Roth *et al.*, 1991; Struhl *et al.*, 1989). Therefore, precisely defining the amount of activated morphogen is crucial to determining their effects. In the *Drosophila* syncytial blastoderm, dorsal-ventral (DV) patterning depends on the nuclear localization gradient of Dorsal (DI), a NFκB superfamily transcription factor homologous to mammalian c-Rel. DI acts in a concentration-dependent manner to activate or repress target genes, defining three main territories of the embryo DV axis: the ventral mesoderm, lateral neuroectoderm, and dorsal ectoderm (Rushlow and Shvartsman, 2012). A ventral-to-dorsal activity gradient of the Toll cell surface receptor provides the activating signal for DV patterning. DI nuclear translocation is controlled by Cactus (Cact), a cytoplasmic protein related to mammalian IκB. In the absence of Toll signals, Cact binds to DI and impairs its nuclear translocation (Bergmann *et al.*, 1996). Activated Toll receptors on the ventral and lateral regions of the embryo lead to Cact phosphorylation followed by ubiquitination and degradation, resulting in dissociation of the DI-Cact complex and DI nuclear import. Different DI levels subdivide the embryonic DV axis in target gene expression domains, defined by distinct thresholds of sensitivity to control by DI (Stein and Stevens, 2014). Thus, the amount of DI in the nuclei is key to defining ventral, lateral and dorsal territories of the embryo.

In attempts to explain the complex DI regulatory signaling network, mathematical models were developed to simulate the DI nuclear gradient. Early models simulated gradient profiles throughout nuclear division cycles 10 to 14 in wild-type embryos, with parameters

constrained by experimental data from endogenous nuclear DI (nDI) levels in fixed embryos or live imaging of DI-GFP (Kanodia *et al.*, 2009; Liberman *et al.*, 2009). Their results showed that the nuclear DI gradient is dynamic, increasing in amplitude from cycle 10 to cycle 14, without significantly changing its shape. Subsequently, it was shown that both the nDI gradient amplitude and basal levels oscillate throughout early embryonic development (Reeves *et al.*, 2012). Recently, it was proposed that facilitated diffusion along the DV axis, or “shuttling” via DI-Cact complexes, plays a role in nDI gradient formation (Carrell *et al.*, 2017). Therefore, these analyses suggest that the establishment of the nDI gradient is a complex process yet to be fully understood.

Former initiatives modeling the nDI gradient focused predominantly on processes regulated by Toll. However, several proteins that impact DI nuclear localization act independent of Toll-receptor activation. For instance, adaptor proteins that are required to transduce Toll signals, such as Tube, Pelle and Myd88, form pre-signaling complexes that depend on the interaction with cytoskeletal elements (Edwards *et al.*, 1997; Galindo *et al.*, 1995; Towb *et al.*, 1998) and the membrane (Ji *et al.*, 2014; Marek and Kagan, 2012). In addition, alterations in Cact concentration and Calpain A protease activity perturb the nDI gradient (Fontenele *et al.*, 2013; Roth *et al.*, 1991). DI itself can flow into and out of the nucleus in the absence of Toll (Carrell *et al.*, 2017; DeLotto *et al.*, 2007), with the potential to contribute significantly to nDI concentration. Since Cact plays a critical role on the control of DI nuclear translocation, understanding how Cact is regulated is paramount.

Two pathways have been reported to regulate Cact levels: the Toll dependent pathway, considered in all the models to date, that leads to Cact N-terminal phosphorylation and degradation through the proteasome, and a Toll-independent pathway that targets Cact C-terminal sequences for phosphorylation (Belvin *et al.*, 1995). This originally termed “signal independent pathway for Cact degradation” (Belvin *et al.*, 1995; Bergmann *et al.*, 1996; Liu *et*

*al.*, 1997; Reach *et al.*, 1996) acts in parallel to Toll-induced signaling (Moussian and Roth, 2005). However, several reports indicate that the signal-independent pathway is regulated by Casein kinase II (Liu *et al.*, 1997; Packman *et al.*, 1997), the BMP protein encoded by *decapentaplegic* (Araujo and Bier, 2000; Carneiro *et al.*, 2006) and by the calcium-dependent modulatory protease Calpain A (Fontenele *et al.*, 2009). Moreover, Calpain A generates a Cact fragment that is more stable than full-length Cact (Araujo *et al.*, 2018; Fontenele *et al.*, 2013), indicating that the Toll-independent pathway may perform unexplored roles in nDI gradient formation.

Recently, by analyzing the effects of a series of *cact* and *dorsal* (*dl*) loss-of-function alleles, we detected a novel function of Cact to promote DI nuclear translocation. In addition to inhibiting DI nuclear import, Cact also acts to favor DI nuclear translocation where Toll signals are high (Cardoso *et al.*, 2017). However, the mechanism behind this effect is unclear. Since previous mathematical models for DI gradient formation did not encompass the two mechanisms that regulate Cact function, here we propose a new reaction-diffusion model to describe this signaling network. We take into account non-uniform activation of Toll as in current models, two DI nuclear translocation mechanisms, translational regulation of Cact by DI (Govind *et al.*, 1993; Kubota and Gay, 1995) and the two pathways leading to Cact regulation: the Toll-regulated and Toll-independent pathways. Using a Genetic Algorithm and experimental data from wild-type *Drosophila* embryos, we calibrate the model parameters, such as kinetic constants, diffusion coefficients, Toll activation profile and total Dorsal concentration in the embryo. The optimized parameters are then used to reproduce and understand the nDI patterns of single and double mutants for *cactus* and *dorsal* genes. Our model analysis indicates that, in the ventral region, Cact favors DI nuclear translocation by the formation of Toll-responsive DI-Cact complexes that signal to DI nuclear localization, while throughout the entire embryo Cact binds to and prevents free DI from entering the nuclei.

# RESULTS

## **A reaction-diffusion model that discriminates two routes for Dorsal nuclear localization highlights the distinctive contribution of Toll-activated versus free DI flow to the nDI gradient**

Embryonically translated from maternal mRNAs deposited in the egg, DI protein enters the nucleus through two different mechanisms: actively imported upon degradation of the Cact inhibitor by Toll signals, and by direct flow in and out of the nucleus (DeLotto *et al.*, 2007). Immunological detection of DI in fixed embryos, or visualization of fluorescently tagged DI in live tissue, does not discriminate the DI dimers that enter nuclei in response to Toll versus those that enter by direct flow. In order to investigate how these different DI nuclear entry modes impact the nuclear DI (nDI) gradient we built a model that discriminates these two mechanisms. In the first mechanism described, activated Toll recruits a 2DI-Cact trimeric complex (DIC) to the TI-signaling complex (DICT) (represented by the reversible reaction related to kinetic constants  $k_7$  and  $k_8$ , Fig. 1), leading to the irreversible dissociation of phosphorylated DI from Cact ( $k_9$ ), Cact degradation ( $k_{10}$ ), and consequent entry of a DI dimer in the nucleus ( $k_{11}$ ). In a final step of this route the DI dimer returns to the cytoplasm ( $k_{12}$ ). The second nuclear entry mode depends on the direct, reversible flow of free DI dimers in and out of the nucleus ( $k_3$  and  $k_4$ ). In the cytoplasm free DI dimers can associate to Cact ( $k_5$  and  $k_6$ ), generating DIC that keeps DI from entering the nuclei. In addition, the model includes Dorsal-mediated translational regulation of Cactus ( $k_1$ ), as well as Toll-independent Cact processing that may generate Cact fragments with different activities and/or leads to Cact degradation ( $k_2$ ) (Belvin *et al.*, 1995; Fontenele *et al.*, 2013). This model reproduces the characteristic ventral-to-dorsal nDI gradient displayed in wild-type embryos during cycle 14

(Fig. 2A-C; Table 1). Furthermore, it allows discriminating the contribution of each DI nuclear transport mechanism along the entire DV axis to generate the compounded nDI pattern (Fig. 2D). Thus, a homogenous direct flow of DI dimers into the nucleus is observed along the DV axis (Fig. 2D,  $nDI^0$ ), while Toll-induced nuclear DI displays ventral-to-dorsal asymmetry (Fig. 2D,  $nDI^*$ ). Consequently, in the ventrolateral region the contribution from the Toll-induced mechanism to nDI levels is much larger than from direct flow, resulting in a significant gradient of nuclear Dorsal. On the other hand, in the dorsal region the contribution from direct flow is predominant.

One fundamental characteristic of the embryonic DI gradient is that it is robust to variations in DI and Cact levels, tolerating a DI/Cact ratio of 0.3 to 2.0 without a significant effect on embryo viability (Govind *et al.*, 1993). In order to test how the amount of total DI protein impacts its nuclear localization, we simulated nDI levels in embryos generated by mothers heterozygous for a loss-of-function *dI* allele (*dI*[6], Cardoso *et al.*, 2017). These embryos (from *dI*[6]/+ mothers) produce less DI protein than embryos generated from wild-type mothers (Cardoso *et al.*, 2017). Even though embryos from *dI*[6]/+ mothers show a reduction in peak nDI in the ventral domain, they do not show a significant change in nDI levels in either the lateral or dorsal regions (Fig. 3A, Cardoso *et al.*, 2017; Carrell *et al.*, 2017). Our model reproduces this pattern and indicates that different DI components behave distinctively in this context: by lowering the total amount of DI (Table 2), Toll-responsive  $nDI^*$  decreases, while  $nDI^0$  that enters the nucleus by direct flow does not change significantly compared to wild type (Fig. 3B). Accordingly, when the model is tested for greater reductions of maternal DI (Fig. 3D) nDI reduces significantly, particularly in the ventral region where  $nDI^*$  is predominant. Furthermore, the model predicts that the ventral peak of DICT reduces in this mutant (Fig. S1F), while DIC that is uniform along the DV axis, reduces evenly as compared to wild type (Fig. 3C). This pattern of DICT and DIC reduction conforms to the fact that *dI*

controls Cact levels (represented by  $k_1$ ): once DI levels drop, so do Cact levels and the amount of both DICT and DIC. The reduction in DICT reduces the concentration of  $nDI^*$  in the ventral region (where DICT is predominant). On the other hand, even though the reduction in DI also decreases the amount of DI that enters the nucleus by direct flow, the consequent Cact decrease leaves more Dorsal dimers free for nuclear translocation.

### **Cact protein acts antagonistically along the DV axis to control the levels of unbound versus complexed DI**

We have previously shown that Cact displays not only a role as inhibitor of DI nuclear translocation, but also acts to favor  $nDI$  localization in ventral nuclei (Fig. 1 in Cardoso *et al.*, 2017). In order to use our model to unveil the molecular mechanism behind this dual role exhibited by Cact, we simulated the pattern of hypomorphic *cact* allelic combinations. Initially, we simulated the *cact*[A2]/*cact*[011] genotype, where total Cact levels are reduced in relation to wild type (Table 2), in addition to uncharacterized effects of the mutant alleles (Cardoso *et al.*, 2017; Fontenele *et al.*, 2013; Roth *et al.*, 1991). This genotype shows two opposing effects reproduced by the model: a decrease in  $nDI$  in the ventral region and an increase in the lateral and dorsal regions of the embryo (Fig. 4A). The  $nDI$  increase in lateral and dorsal regions of the embryo reflects Cact's classical role described by many authors to inhibit DI nuclear translocation (Belvin *et al.*, 1995; Bergmann *et al.*, 1996; Govind *et al.*, 1993; Reach *et al.*, 1996; Roth *et al.*, 1991). Contrarily, the  $nDI$  decrease in ventral nuclei, where Toll activation is high, requires a detailed model analysis to be understood.

By analyzing direct and Toll dependent DI nuclear entry modes separately we found that both are affected, albeit differently, by reducing Cact levels (Fig. 4C). The amount of DI that directly enters the nuclei ( $nDI^0$ ) increases equally along the entire DV axis, consistent with a homogenous increase of free DI dimers in the cytoplasm ( $cDI^0$ , Fig. S2A). This



behavior reflects the well-characterized role of Cact to inhibit DI nuclear translocation. Conversely, the amount of DI entering the nucleus in response to the Toll pathway ( $nDI^*$ ) reduces compared to wild type, particularly in the ventral side of the embryo. This  $nDI^*$  reduction in *cact*[A2]/*cact*[011] reflects loss of a positive role of Cact on DI nuclear localization. The transition between the positive and negative effects of Cact reduction on DI nuclear levels is placed exactly at the position along the DV axis where DI translocation induced by the Toll pathway (dashed blue line in Fig. 4C) matches the amount of DI that enters by direct flow (dotted blue line in Fig. 4C). This falls inside the lateral domain where intermediate Toll activation takes place. It is important to point out that DI nuclear import through the Toll pathway is more efficient than via direct flow: the ratio between kinetic constants for Toll-dependent DI nuclear transport ( $k_{11}/k_{12} = 545.45$ ) is higher than via direct flow ( $k_3/k_4 = 1.95$ ; Table 1). This is critical to the dual effect observed for *cact*[A2]/*cact*[011]. Since the decrease of DI that translocate to the nucleus in response to Toll ( $nDI^*$ ; Fig. 4C) is greater than the increase in DI entering the nuclei by direct flow ( $nDI^0$ ; Fig. 4C), the resulting effect is a reduction of total nuclear DI ( $nDI^0 + nDI^*$ ) in the most ventral region (Fig. 4B-C). Importantly, in addition to the difference in nuclear resident time between  $nDI^0$  and  $nDI^*$  suggested by the ratios above, we should note that the effect of  $nDI^0$  and  $nDI^*$  on gene expression will also depend on their distinct efficiencies to bind target DNA.

Interestingly, if we consider the different cytoplasmic DI species that are free ( $cDI^0 + cDI^*$ ) versus bound to Cact ( $DIC + DICT$ ; Fig. 4D), we see that the amount of Cact-bound DI decreases in the *cact* mutant as compared to wild type. This conforms to experimental data from crude embryonic lysates showing that in *cact* loss-of-function alleles the total amount of DI-Cact complexes observed in non-reducing gels decreases compared to wild type (Isoda and Nusslein-Volhard, 1994). Accordingly, in our analysis, as the amount of DICT (Fig. S2F) reduces, a consequent reduction in the amount of modified DI in the cytoplasm ( $cDI^*$ ) and

nuclei (nDI\*) is seen (Fig. S2H,I). This nDI\* decrease is in agreement with the loss of ventral gene expression (high DI activated genes) and ventral expansion of lateral gene expression (intermediate DI level targets) that is observed in this genotype (Cardoso *et al.*, 2017).

In order to investigate the effect of more severe reductions in Cact concentration we performed additional simulations with different production rates of Cact, from wild-type rates to zero, that is, in the absence of Cact (Fig. 4E). The model predicts an increase in the Cact dual effect resulting from reductions in Cact levels: In all conditions a more severe loss of Cact lead to less nDI in the ventral side and more nDI in dorsal regions. Furthermore, the model correctly predicts that in Cact absence the gradient is completely lost, reflecting the pattern of an embryo with expanded lateral territories, as shown for some loss-of-function Toll alleles and certain allelic *cact* combinations (Cardoso *et al.*, 2017; Ray *et al.*, 1991; Anderson *et al.*, 1985a; Roth *et al.*, 1989). This is also consistent with the main role proposed for Toll being to generate graded DI activity along the DV axis (Anderson *et al.*, 1985a) as opposed to a basic requirement for DI nuclear translocation.

### ***dl/cact* double mutant reduces the levels of Toll-responsive Dorsal-Cactus complexes causing loss of precision in target gene expression domains**

Since our results indicate that Cact favors DI nuclear translocation in the ventral side of the embryo, we decided to challenge this prediction by decreasing DI and Cact concomitantly. If model prediction is correct, reducing both Cact and DI should produce a more severe impact in the ventral nDI peak compared to the single *dl[6]/+* mutant. This condition is experimentally reached with the *dl[6]/cact[A2]* allelic combination, where the levels of both DI and Cact are reduced (Fig. 5A and S3). We simulated the *dl[6]/cact[A2]* mutant by decreasing total DI (maintained constant throughout the simulation) and the kinetic constant  $k_1$ , related to Cact production (see Fig. 1A, B; Table 2). The model shows that lowering Cact levels in a

*dll*[6]/+ background produces an additional impact in DI nuclear translocation in the most ventral region and confirms that Cact has a positive role on DI nuclear localization. Model discrimination of Toll-induced ( $nDI^*$ ) and direct DI flow ( $nDI^0$ , Fig. 5B) indicates that in this allelic combination both DI nuclear translocation mechanisms are reduced.

In the dorsal region, the effect of reducing Cact production (that has the potential to increase  $nDI$  levels, Fig. 4) is almost completely canceled by the reduction in DI levels (Fig. 5A). Consequently, the dual effect of Cact reduction is no longer observed (compare Fig. 5A and Fig. 4B). By distinguishing the amount of  $nDI^*$  and  $nDI^0$ , the model shows that  $nDI$  resulting from direct flow ( $nDI^0$ ) decreases uniformly along the DV axis and that Toll-responsive  $nDI^*$  decreases ventro-laterally (Fig. 5B). Therefore, in ventral regions the reduction in  $nDI$  is compounded by a decrease in both DI translocation by Toll-dependent and direct flow entry modes. Importantly, the effect on the amount of complexed (DIC + DICT) versus free cytoplasmic DI observed in *dll*[6]/*cact*[A2] (Fig. 5C) contrasts from the effect of reducing Cact alone (Fig. 4D). In *dll*[6]/*cact*[A2], both complexed and free DI are reduced compared to wild type, while in *cact*[A2]/*cact*[011] a reduction in DI complexes and increase in free DI is observed. This indicates that a decrease in the relative amount of complexed versus free DI is critical for the dual effect observed for *cact* loss-of-function.

In considering the role of a morphogen and how the regulatory network impacts morphogen activity it is important to address how the network affects target gene expression domains. A current discussion in the literature concerns whether changes in the slope of the DI gradient affect target gene expression, especially in the lateral region (Lieberman *et al.*, 2009; Reeves *et al.*, 2012). It is discussed whether differences in the relative amount of  $nDI$  in neighboring nuclei are sufficient to define the necessary thresholds for differential gene expression. In wild-type embryos, the *snail/sog* sharp boundary delimits the ventral mesoderm and lateral neuroectoderm domains, positioned at 20% of the DV axis. In

*dll*[6]/*cact*[A2] embryos, which lack ventral-lateral boundary precision, the border between the *sog* and *sna* domains is not clearly defined, and *sog* exhibits stochastic expression invading the ventral region (Fig. 6A; Cardoso *et al.*, 2017). Therefore, we decided to investigate whether the DI gradient slope was different among all the genotypes hereby analyzed. To this end, we plotted the derivative of the total nuclear Dorsal concentration (nDI) with respect to the DV axis (Fig. 6B), where the derivative represents the difference in nDI levels between neighboring nuclei along the DV axis. We observed that, although all nDI gradients show similar shape, highest slope values are different for each genotype. Indeed, wild type achieves the greatest absolute slope, whereas the gradient displayed by the *dll*[6]/*cact*[A2] genotype shows the lowest slope (Fig. 6C). This result suggests that in wild-type embryos, the lateral adjacent nuclei exhibit a greater difference in the relative amount of nDI than *dll*[6]/*cact*[A2], which could lead to a precise definition of the embryo's domains in the control, while the mutant displays less precise domains. This analysis indicates that the relative concentration of nuclear DI between neighboring nuclei indeed plays a role for domain precision. Conversely, loss of precision in the *sna/sog* border is not observed in *dll*[6]/+ and *cact*[A2]/*cact*[011] embryos (Cardoso *et al.*, 2017), indicating that these two mutants still exhibit sufficiently large slopes to define nuclear interdomain differences. Importantly, it has been shown that the refinement of ventral-lateral gene expression borders is also mediated by RNA polymerase II stalling on transcription start sites (Bothma *et al.*, 2011; Levine, 2011; Zeitlinger *et al.*, 2007), as reported for *short gastrulation* (*sog*) (Bothma *et al.*, 2011). Therefore, a combined effect of distinct nDI levels and transcriptional processes may define the precise gene expression border between adjacent ventral and lateral nuclei of the *Drosophila* blastoderm embryo.

## Model simulations reproduce Toll-dependent and Toll independent pathway mutant conditions

To challenge the predictive strength of our model we simulated different mutant conditions described in the literature and their effects on the nDI gradient. First, we simulated a *pelle* mutant (*pII*<sup>-</sup>). Pelle is a DEAD-domain kinase activated downstream of the Toll receptor, likely involved in Cact phosphorylation with consequent ubiquitination and degradation by the proteasome (Daigneault *et al.*, 2013; Liu *et al.*, 1997). Loss-of-function maternal *pII* mutants lead to dorsalized embryos, with loss of lateral and ventral elements of the cuticle (Galindo *et al.*, 1995; Shelton and Wasserman, 1993). By reducing  $k_9$  or  $k_{10}$ , the constants controlling Cact phosphorylation and release of DI dimers for nuclear translocation (Fig. 1), nDI levels gradually decrease. At  $k_9$  or  $k_{10} = 0$ , all nuclei display the same level of nDI, equivalent to levels observed in the dorsal region of wild-type embryos (Fig 7A). Accordingly, the amount of DICT and DIC accumulates (Fig. 7B,C), since DI dimers are not released from Cact inhibition. This effect is restricted to ventral and lateral regions where pre-signaling complexes are recruited to active Toll. No effect is seen in the dorsal region where nDI results solely from direct DI flow.

Different from *pII* loss-of-function, *Toll*<sup>[rm9]</sup> loss-of-function mutants lead to lateralized embryos, where the level of nDI is uniform along the entire DV axis and induces the expression of lateral DI-target genes that require intermediate DI levels for activation (Liberman *et al.*, 2009). By simulating a decrease in the amount of activated Toll, we observe that the nDI gradient flattens to a uniform level along the DV axis (Fig. 7D). In addition, DICT reduces while DIC increases progressively compared to wild type (Fig. 7E-F). Thus, the main difference we observe by simulating *Toll*<sup>-</sup> and *pII*<sup>-</sup> is that in *pII*<sup>-</sup> there is an increase in DICT, while in *Toll*<sup>-</sup> the concentration of this complex reduces (Fig. 7E,F).

To explore the effects of alterations in the Toll-independent pathway for Cact regulation we changed kinetic parameters that are not directly related to Toll receptor activation, namely,  $k_2$  and  $k_5$ . Decreasing any of these constants led to contrasting effects on dorsal versus ventral regions of the embryo, replicating the dual effect we observe in *cact*[A2]/*cact*[011] (Fig. S5E-H). Conversely, by increasing  $k_5$  we were able to recover the *cact*[A2]/*cact*[011] dual phenotype (Fig. 7G-I). A similar effect is observed by increasing  $k_2$  or  $k_7$  in the same *cact*[A2]/*cact*[011] background (Fig. S5 A-D). Recovery to the wild-type pattern is paralleled by a homogeneous decrease in  $nDI^0$  (Fig. 7H and Fig. S5B) and ventral increase of  $nDI^*$  (Fig. 7I and Fig. S5C). Interestingly, this effect closely resembles that seen by providing excess Cact[E10]eGFP to *cact*[A2]/*cact*[011] embryos (Cardoso *et al.*, 2017). This suggests that the N-terminal deleted Cact[E10] fragment inhibits basal nuclear translocation of DI ( $nDI^0$ ) and favors  $nDI^*$  by an unknown mechanism that should be explored in the future. We also simulated the effect of enhancing Toll signals in a *cact*[A2]/*cact*[011] background, by increasing  $k_9$ . As a result, in ventral regions of the embryo  $nDI$  recovers the simulated *cact*[A2]/*cact*[011] gradients to wild-type levels. However, the gradient is unchanged in dorsal regions (Fig. 7J-L). Altogether, these results indicate the dual effect observed in *cact* mutants requires Cactus regulation by Toll-independent events.

## DISCUSSION

### **Cactus plays a positive role for DI nuclear transport by controlling the levels of Toll-responsive Dorsal-Cactus complexes**

The *Drosophila* embryo is a unique setting for investigating Toll pathway function, as each genetically identical nucleus receives a unique level of Toll activation, distinct from its neighbor nuclei. Dorsal-ventral patterning of the embryo depends on this graded activity,

instigating scientists to model the steps from Toll activation to formation of the nuclear Dorsal gradient. The predictive network model herein proposed adds novel elements to the regulatory network modeling of nDI gradient formation in the *Drosophila* embryo and expands our understanding of mechanisms that control NF $\kappa$ B/c-Rel activity.

First, the model enables us to explore the contribution of Toll-activated versus direct DI nuclear translocation to the nDI gradient. In simulating a wild-type context, the model predicts a uniform level of nDI imported by the direct pathway, consistent with the previously reported uniform flow of dimers from cytoplasm to nucleus along the DV axis (DeLotto *et al.*, 2007). According to model parameters, DI nuclear translocation by the Toll pathway is more efficient than by direct flow, which is also supported by experimental data (Drier *et al.*, 1999). Furthermore, by predicting the individual concentrations of all chemical species, the model indicates that the majority of cytoplasmic DI is bound to either Cact and/or Toll receptor (DIC and DICT), conforming to the relative levels of free versus Cact-bound DI protein in embryonic extracts (Isoda and Nusslein-Volhard, 1994).

Second, the proposed model reproduces the dual effect of *cact* loss-of-function combinations and points out the essential components of the network that enable this dual effect. Broadly accepted as an NF $\kappa$ B family protein inhibitor with the role of securing DI in the cytoplasm, our finding of a Cact function to favor Toll signals implies the existence of unexplored mechanisms that control DI activity. Our simulations implicate the translational control of Cact levels by DI protein and two modes of DI nuclear translocation, Toll dependent and direct DI nuclear translocation, as key aspects of DI gradient formation. The most important components involved in these two routes are DIC and DICT complexes. In forming DIC, Cact plays a negative role to impair DI from entering the nucleus, while by enabling new DICT complexes it favors DI nuclear translocation. Since Toll activity is high ventrally, DICT predominates in this region. Contrarily, in the dorsal region only DIC is observed. Therefore,

simulations suggest that this differential distribution, together with the opposite role that Cact plays in each DV region, are the characteristics that enable Cact dual effect on DI nuclear translocation (Fig. 4). The generation of endogenous *dl* and *cact* alleles that either increase or decrease the rate of association between DI, Cact and Toll pathway adaptor proteins should enable to test these predictions by altering the relative amount of free protein versus protein complexes.

By simulating additional mutant conditions that decrease Cact function, our model confirms that the two modes of DI nuclear translocation are the basis of the dual effect of Cact to favor DI nuclear translocation ventrally and inhibit DI nuclear translocation dorsally. These simulations indicate that the lower the expression of Cact, the greater the amount of nDI that enters the nucleus by direct flow, contributing to increase the basal (uniform) component of nDI concentration. Notably, increasing Toll pathway activity (increasing  $k_9$ ) does not recover the full *cact* loss-of-function phenotype. Only by modifying the constants associated to Toll-independent processes we were able to recover the phenotype to a wild-type pattern. This indicates that the Toll-independent pathway is fundamental for Cact to perform its different effects. It will be interesting to investigate in greater detail how the Toll-independent pathway controls basal DI nuclear translocation and how it contributes to the nDI gradient.

## Two routes for Dorsal nuclear translocation as an extension of previous models

The pioneer model proposed by Kanodia et al. (2009) to explain Dorsal gradient dynamics during *Drosophila* embryogenesis was very successful in pinpointing the most important features of gradient formation during nuclear division cycles 11-14. This model also proved extremely powerful when comparing nDI gradient formation in related *drosophilids*. (Ambrosi et al., 2014). In this publication, Ambrosi also suggest that Cactus is the most important element that allows the correct gradient accommodation in embryos of greatly



divergent sizes. However, previous models confer Cactus only an inhibitory role, where less Cactus in the cytoplasm is expected to decrease Cactus-Dorsal association, favoring Toll dependent Dorsal nuclear localization. Inspired by the fact that in certain Cactus loss-of-function mutants nuclear Dorsal concentration decreases in ventral regions, we have proposed a two-step model that accounts for this peculiarity. First, the concentration of Cactus-Dorsal complex is controlled by a Toll-independent mechanism involving Cactus synthesis and processing or recruitment into a complex with DI. Second, the DIC complex associates with Toll, which promotes facilitated entry of Dorsal into nuclei and irreversible Toll-dependent Cactus degradation. In this case less Cactus results in less DIC + DICT complexes and consequently, contrary to the previous model, less Toll-induced Dorsal entry into the nuclei whenever the balance between Toll signals and availability of new DIC + DICT signaling complexes is perturbed. The general result of this model is that nuclear Dorsal follows the Toll activation gradient plus a basal uniform concentration due to the direct entry of Dorsal independent of Toll, also introduced in the model.

A fundamental feature of our network that enables to simulate Cactus' positive function is that the formation of DIC complexes depends not only on Toll activation but also on association-dissociation events that may be controlled by Toll-independent inputs. Variation in the amount of DIC complexes may explain why the free flow of Dorsal into the nucleus ( $nDI^0$ ) is almost unaffected in *dll[6]/+* mutants, compared to the significant decrease in Toll-induced  $nDI$  ( $nDI^*$ ). DIC decreases roughly 30% as a result of a 15% decrease in total DI protein (Fig. 3C, inset), whereas free DI reduces only 10% ( $cDI^0$  and  $nDI^0$ ; Fig. S1) as there is less Cact to form DIC. On the other hand, in the ventral side of the embryo 20% less  $nDI$  enters the nucleus in response to Toll activation ( $nDI^*$ ), since there is less DIC to form new Toll responsive complexes (DICT). Accordingly, in the ventral domain of *cact[A2]/cact[011]* embryos, DIC decreases 50%, leading to a great decrease in DICT and Toll-induced DI

nuclear translocation, although direct DI flow increases (Fig. S2 and Fig. S4). It is noteworthy that, since the ratio between kinetic constants for Toll-dependent DI nuclear transport ( $k_{11}/k_{12} = 545.45$ ) is higher than via direct flow ( $k_3/k_4 = 1.95$ ), the Toll induced DI nuclear translocation process is more efficient than DI free flow. Therefore, alterations in DIC affect differently the two DI nuclear translocation routes.

The observation that DIC is central to explaining the behavior of the different mutant conditions hereby analyzed points to the importance of identifying regulators of DIC formation. Processes that control the mobilization of DIC to mount new Toll-signaling complexes (DICT) or that alter the availability of DI and Cact for association-dissociation events are likely to induce unanticipated effects on NF $\kappa$ B family transcription factor activity. Among the signals that control Cactus independent of Toll, Calpain A, that impacts the nDI gradient (Fontenele *et al.*, 2013), may also control the formation of DIC and DICT complexes since it localizes close to the membrane where these events should take place (Fontenele *et al.*, 2009). Future investigations on the effect of Calpain A and other Toll-independent pathway regulators on DIC levels and free DI and Cact may shed light on these important issues.

Further extensions of the Kanodia model were proposed in the literature by taking into account the presence of Cactus in the nuclei (O'Connell and Reeves, 2015) and by implying diffusion rates that lead to shuttling of Cactus-Dorsal along the DV axis (Carrell *et al.*, 2017). We show that our model simulations correctly reproduce nDI properties displayed in several mutants, without need of any additional assumption.

### **The balance between reaction and diffusion of free and complexed Dorsal and Cactus**

Molecular diffusion of proteins involved in the response to Toll signals greatly impacts the nuclear Dorsal concentration gradient. Our model suggests that, due to interaction with the Toll receptor, the DIC complex diffusivity is lower than free DI and Cact (Table 1).

Paradoxically,  $cDI^0$ ,  $nDI^0$ , Cact and DIC show uniform distribution along the embryonic DV axis (Fig. S1A-D), despite interacting with non-uniformly distributed DICT and  $nDI^*$ . The answer to this paradox lies in the balance between lateral (DV) diffusion and DI nuclear translocation. It is important to note that both  $cDI^*$  and  $cDI^0$  translocate to the nucleus, an action that competes with movement to the adjacent lateral compartment. However, the intercompartmental diffusion term  $D_{DI} / L^2$  ( $L = 1/50$  on the normalized scale, hence  $D_{DI} / L^2 \approx 227.500$  in inverse time units) is much larger than the kinetic constants  $k_3$ ,  $k_5$  and  $k_{11}$  (direct flow, DIC complex formation and Toll mediated DI nuclear entrance, respectively). Thus, diffusive dynamics throughout the cytoplasm dominates the kinetics of  $cDI^0$ , leading to uniform free Dorsal throughout the embryo, even though total nuclear DI obeys a gradient. We found a similar scenario for Cactus, given that  $D_C / L^2 \approx 1.037.500$  (in inverse time units) is much larger than kinetic constant  $k_2$  and  $k_5$ . We found an opposite behavior for the Dorsal-Cact complex, which is not as diffusible as the free forms. It is noticeable that  $D_{DIC} / L^2 \approx 0.08475$  is much lower than  $k_{11}$ , which favors the entry of DI into the nucleus via the Toll pathway in the ventral and lateral regions. This value is also much lower than  $k_6$ , the reversible process that returns the complexed form DIC to the free forms  $cDI^0$  and  $C_f$ . Therefore, low DIC diffusivity favors the kinetics of DIC binding to the Toll receptor, making the DICT gradient strongly correlated to the Toll activation profile.

It has been previously reported that the diffusion between adjacent compartments takes place much more slowly than diffusion within individual nucleo-cytoplasmic compartments during mitosis (Daniels *et al.*, 2012), since the cytoplasm surrounding each nucleus is partially compartmentalized (DeLotto *et al.*, 2007). Also, Kanodia and collaborators (Kanodia *et al.*, 2009) assumed that the diffusion coefficient of Dorsal-Cact complex (DIC), free Dorsal and Cact are identical, resulting in a lateral transport coefficient of approximately one. This indicates that each of the molecular species above traverses a single compartment

during cycle 14. Besides that, even reporting different diffusion coefficients for Dorsal and Cactus, (Carrell *et al.*, 2017) estimate that Dorsal travels 7-10 compartments over a 90-minute period (cycles 10 to 14), and then argues that, taking into account the changing distances between nucleo-cytoplasmic compartments due to mitosis, the transport coefficient is centered around 1. We found a similar result for the lateral transport coefficient for the DIC complex ( $\lambda = D_{DIC} T / L^2 \approx 5$  where  $T = 60$  minutes is the total cycle 14 time duration). However, this value may be overestimated since we simulated only the 14th mitotic cycle, setting a uniform distribution of cytoplasmic free Dorsal  $cDI^0$  as the initial condition (see Methods for more details). Furthermore, along cycle 14 membrane furrows extend and close around each nucleus, limiting further the extent of lateral diffusion.

The above results indicate that our model simulations agree with the confinement of Dorsal within individual nucleo-cytoplasmic compartments as proposed by others, but indicates that this holds true only for the Dorsal-Cact complex. The diffusion of individual species DI and Cact, on the other hand, plays a critical role for the balance between reaction and diffusion required to correctly establish and maintain the DI nuclear gradient, as described above.

## **A conserved regulatory network for Cactus/I $\kappa$ B function**

Toll was initially described in *Drosophila* embryos as a maternal effect allele regulating DV patterning (Anderson *et al.*, 1985b). However, it has been suggested that the function of Toll to pattern the DV axis is restricted to the insect lineage, while regulating the innate immune response is an ancient and widespread function (Benton *et al.*, 2016; Lynch and Roth, 2011). In either context, elements of the Toll pathway are conserved in Bilateria. Conservation is not restricted to elements downstream of the Toll receptor. Toll-dependent and -independent pathways have been reported to regulate vertebrate I $\kappa$ B, as shown for

*Drosophila* Cact. In mammalian cells, it has been proposed that constitutive degradation of I $\kappa$ B $\alpha$  independent of the proteasome regulates basal levels of I $\kappa$ B and thus the duration of the NF $\kappa$ B response (Han *et al.*, 1999; Karin and Ben-Neriah, 2000; Shen *et al.*, 2001; Shumway *et al.*, 1999). Experimental data and modeling of signal independent I $\kappa$ B regulation suggest that the regulatory pathway controlling free I $\kappa$ B is a major determinant of constitutive NF $\kappa$ B and of stimulus responsiveness of the NF $\kappa$ B signaling module (O'Dea *et al.*, 2007). Furthermore, calcium-dependent Calpain proteases also target mammalian I $\kappa$ B independent of Toll receptors (Schaecher *et al.*, 2004; Shen *et al.*, 2001; Shumway *et al.*, 1999), as reported for Cact in the embryo and immune system (Fontenele *et al.*, 2009; Fontenele *et al.*, 2013). Unlike *Drosophila*, vertebrates rely on several I $\kappa$ B proteins, where the final effect on the immune response over time is a result of the compounded effect of three or more I $\kappa$ Bs (Kearns *et al.*, 2006). Interestingly, it has been shown that I $\kappa$ B $\beta$  knockout mice display a dramatic reduction of TNF $\alpha$  in response to lipopolysaccharide (LPS), suggesting that I $\kappa$ B $\beta$  acts to both inhibit and activate gene expression (Rao *et al.*, 2010). Even though the molecular mechanism proposed by Rao *et al.* for I $\kappa$ B $\beta$  is different from the here presented for Cact, they are similar in the sense that both are able to improve NF $\kappa$ B family transcriptional activity. Therefore, there is an open avenue of investigation on the mechanisms that regulate Cact/I $\kappa$ B function with potentially important outcomes for immunity. Altogether, the results herein presented credit to I $\kappa$ B/Cact protein a key role in NF $\kappa$ B activity greater than previously reported.

# METHODS

## Mathematical modeling of DI nuclear gradient formation

The proposed reaction-diffusion model is a refinement of (Kanodia *et al.*, 2009), in which the authors described DI and Cact dynamics by a reaction-diffusion regulatory network along a 1D spatial domain that represents embryo's outline in a dorsal-to-ventral cross section. The pioneer model was used and modified by others (Carrell *et al.*, 2017; O'Connell and Reeves, 2015). Here we expanded this model to take into account the translational control of Cact levels by DI protein and the two different routes for Dorsal nuclear localization.

We assumed that the embryo is symmetric with respect to the DV axis, therefore, all simulations acknowledge only one of the embryo's dorsal-ventral cross-section half, considering no-exchange boundary conditions at both ventral and dorsal midlines. The number of compartments is fixed and their sizes are equal, such that the length of the whole simulation region is one, for computational convenience.

Dorsal dimerization was not described in the model, since nuclear input dynamics is restricted to the dimeric form. Thus, although the model refers simply to DI, it should be kept in mind that, for the purposes of this work, the species in question is always the corresponding dimer. The association of cytoplasmic Dorsal dimer ( $cDI^o$ ) with Cactus ( $C_i$ ) is also described and the resulting complex is treated as a new species (DIC). In addition, direct nuclear Dorsal import and export is treated as a reversible reaction in which nuclear Dorsal is treated as a new nuclear species ( $nDI^o$ ).

The Toll receptor (T) in the model is the one activated by Spätzle, and hence its distribution along the dorsoventral region in the embryo is not uniform. In this work, it was assumed that its distribution is Gaussian, whose mean value is in the most ventral part of the

embryo, and its standard deviation and intensity peak are two parameters fitted to experimental data, along with the kinetic constants and the diffusion coefficients.

In addition to participating in the reactions, Fig. 1, some of the proteins can diffuse along the compartments. In particular,  $cDI^o$ ,  $C_f$  and  $DIC$  can diffuse following Fick's Law whereas  $cDI^*$  and  $C_{ub}$  reaction dynamics are considered much faster than their diffusion capacities, hence they do not have diffusion coefficients associated with them. All of the processes, which are modelled as chemical reactions, take place inside each compartment and are described by the Mass Action Law. Further details about the resulting differential equations are displayed in Supplementary Text.

## Model calibration and simulation

To determine the model parameters, we calibrated kinetic parameters  $k_1$  to  $k_{12}$ ,  $cDI^o$ ,  $C_f$  and  $DIC$  diffusion coefficients, total  $DI$  concentration, and Toll receptor intensity peak and standard deviation (assuming that its activation follows a Gaussian function centered at the most ventral region of the embryo) using experimental data of nuclear mitotic cycle 14 wild-type *Drosophila* embryos (Cardoso *et al.*, 2017). We set up an optimization problem such that the objective function is the quadratic loss where the model total nuclear  $DI$  (the sum of  $nDI^o$  and  $nDI^*$ ) was compared to experimental nuclear Dorsal data. The sum of the quadratic differences between simulation and experimental data was minimized. The experimental data used was normalized so that the peak of  $nDI$  concentration at the most ventral midline is 1.

Since the loss function is not explicitly defined in terms of the parameter because it results from the numerical solution of a Partial Differential Equations System (PDEs), metaheuristics become convenient for intelligently exploring parameter possibilities, saving computational cost to obtain a viable set of parameters. Among several techniques, we have adopted the Genetic Algorithm (GA), which was implemented using a binary codification of

the parameters, a selection by a k-tournament, a uniform bit-wise crossover and a mutation by bit-wise inversion (Gen and Lin, 2008; Mitchell, 1998).

For each individual in the Genetic Algorithm population, which corresponds to a set of parameters to be evaluated and ranked by the objective function, we have solved the PDEs by doing a second-order central approximation to deal with spatial coordinates, giving rise to an ODE system for each compartment. Subsequently, a linear implicit multistep method based on 6<sup>th</sup> order finite differences (BDF-6 formula) was used to solve each ODE in time (Ashino *et al.*, 2000; Shampine and Reichelt, 1997). The computation was done such that it ended when the system had reached a steady state for each individual in the GA population.

After running the program and finding out an optimized set of parameters, the mutant simulations have been done by changing specific parameters and comparing the newer simulations with determined set of experimental data (Cardoso *et al.*, 2017). For *dl6/+* mutants, we have only changed total DI concentration; for *cact*-related mutants, kinetic constant  $k_1$ , which is related to DI regulation of Cact, was changed; and both of these parameters were changed for *dl6/cact<sup>A2</sup>* mutant. Further details about the equations, GA's parameters and other specifications can be found in Supplementary Text.

## Acknowledgments

We thank Trudi Schupbach for helpful comments on the manuscript.

## Funding

FL and HA was supported by FAPERJ - Fundação de Amparo à Pesquisa do Estado do Rio de Janeiro [Grant no. E-26 010.001877/2015].



## REFERENCES

- Ambrosi, P. *et al.*, 2014. Modeling of the dorsal gradient across species reveals interaction between embryo morphology and Toll signaling pathway during evolution. *PLoS Comput Biol.* 10, e1003807.
- Anderson, K.V. *et al.*, 1985a. Establishment of dorsal-ventral polarity in the *Drosophila* embryo: the induction of polarity by the Toll gene product. *Cell.* 42, 791-8.
- Anderson, K.V. *et al.*, 1985b. Establishment of dorsal-ventral polarity in the *Drosophila* embryo: genetic studies on the role of the Toll gene product. *Cell.* 42, 779-89.
- Araujo, H. and Bier, E., 2000. *sog* and *dpp* exert opposing maternal functions to modify toll signaling and pattern the dorsoventral axis of the *Drosophila* embryo. *Development.* 127, 3631-44.
- Araujo, H. *et al.*, 2018. Translating genetic, biochemical and structural information to the calpain view of development. *Mech Dev.* 154, 240-250.
- Ashino, R., Nagase, M., Vaillancourt, R., 2000. Behind and beyond the Matlab ODE suite. *Computers & Mathematics with Applications.* 40, 491-512.
- Belvin, M.P. *et al.*, 1995. Cactus protein degradation mediates *Drosophila* dorsal-ventral signaling. *Genes Dev.* 9, 783-93.
- Benton, M.A. *et al.*, 2016. Toll Genes Have an Ancestral Role in Axis Elongation. *Curr Biol.* 26, 1609-1615.
- Bergmann, A. *et al.*, 1996. A gradient of cytoplasmic Cactus degradation establishes the nuclear localization gradient of the dorsal morphogen in *Drosophila*. *Mech Dev.* 60, 109-23.

- Bothma, J.P. *et al.*, 2011. The snail repressor inhibits release, not elongation, of paused Pol II in the *Drosophila* embryo. *Curr Biol.* 21, 1571-7.
- Cardoso, M.A. *et al.*, 2017. A novel function for the IkappaB inhibitor Cactus in promoting Dorsal nuclear localization and activity in the *Drosophila* embryo. *Development.* 144, 2907-2913.
- Carneiro, K. *et al.*, 2006. Graded maternal short gastrulation protein contributes to embryonic dorsal-ventral patterning by delayed induction. *Dev Biol.* 296, 203-18.
- Carrell, S.N. *et al.*, 2017. A facilitated diffusion mechanism establishes the *Drosophila* Dorsal gradient. *Development.* 144, 4450-4461.
- Daigneault, J. *et al.*, 2013. The IRAK homolog Pelle is the functional counterpart of IkappaB kinase in the *Drosophila* Toll pathway. *PLoS One.* 8, e75150.
- Daniels, B. R. *et al.*, 2012. Multiscale diffusion in the mitotic *Drosophila melanogaster* syncytial blastoderm. *Proceedings of the National Academy of Sciences*, v. 109, n. 22, p. 8588-8593.
- DeLotto, R. *et al.*, 2007. Nucleocytoplasmic shuttling mediates the dynamic maintenance of nuclear Dorsal levels during *Drosophila* embryogenesis. *Development.* 134, 4233-41.
- Drier, E.A. *et al.*, 1999. Nuclear import of the *Drosophila* Rel protein Dorsal is regulated by phosphorylation. *Genes Dev.* 13, 556-68.
- Driever, W. and Nusslein-Volhard, C., 1988. The bicoid protein determines position in the *Drosophila* embryo in a concentration-dependent manner. *Cell.* 54, 95-104.
- Edwards, D.N. *et al.*, 1997. An activity-dependent network of interactions links the Rel protein Dorsal with its cytoplasmic regulators. *Development.* 124, 3855-64.
- Fontenele, M. *et al.*, 2009. The Ca<sup>2+</sup>-dependent protease Calpain A regulates Cactus/IkappaB levels during *Drosophila* development in response to maternal Dpp signals. *Mech Dev.* 126, 737-51.

- Fontenele, M. *et al.*, 2013. Calpain A modulates Toll responses by limited Cactus/IkappaB proteolysis. *Mol Biol Cell*. 24, 2966-80.
- Galindo, R.L. *et al.*, 1995. Interaction of the pelle kinase with the membrane-associated protein tube is required for transduction of the dorsoventral signal in *Drosophila* embryos. *Development*. 121, 2209-18.
- Gen, M. and Lin, L., 2008. Genetic Algorithms. In *Wiley Encyclopedia of Computer Science and Engineering*, B.W. Wah (Ed.).
- Govind, S. *et al.*, 1993. Homeostatic balance between dorsal and cactus proteins in the *Drosophila* embryo. *Development*. 117, 135-48.
- Han, Y. *et al.*, 1999. Tumor necrosis factor-alpha-inducible IkappaBalpha proteolysis mediated by cytosolic m-calpain. A mechanism parallel to the ubiquitin-proteasome pathway for nuclear factor-kappaB activation. *J Biol Chem*. 274, 787-94.
- Isoda, K. and Nusslein-Volhard, C., 1994. Disulfide cross-linking in crude embryonic lysates reveals three complexes of the *Drosophila* morphogen dorsal and its inhibitor cactus. *Proc Natl Acad Sci U S A*. 91, 5350-4.
- Ji, S. *et al.*, 2014. Cell-surface localization of Pellino antagonizes Toll-mediated innate immune signalling by controlling MyD88 turnover in *Drosophila*. *Nat Commun*. 5, 3458.
- Kanodia, J.S. *et al.*, 2009. Dynamics of the Dorsal morphogen gradient. *Proc Natl Acad Sci U S A*. 106, 21707-12.
- Karin, M. and Ben-Neriah, Y., 2000. Phosphorylation meets ubiquitination: the control of NF-[kappa]B activity. *Annu Rev Immunol*. 18, 621-63.
- Kearns, J.D. *et al.*, 2006. IkappaBepsilon provides negative feedback to control NF-kappaB oscillations, signaling dynamics, and inflammatory gene expression. *J Cell Biol*. 173, 659-64.

- Kubota, K. and Gay, N.J., 1995. The dorsal protein enhances the biosynthesis and stability of the *Drosophila* I kappa B homologue cactus. *Nucleic Acids Res.* 23, 3111-8.
- Levine, M., 2011. Paused RNA polymerase II as a developmental checkpoint. *Cell.* 145, 502-11.
- Liberman, L.M. *et al.*, 2009. Quantitative imaging of the Dorsal nuclear gradient reveals limitations to threshold-dependent patterning in *Drosophila*. *Proc Natl Acad Sci U S A.* 106, 22317-22.
- Liu, Z.P. *et al.*, 1997. A role for CKII phosphorylation of the cactus PEST domain in dorsoventral patterning of the *Drosophila* embryo. *Genes Dev.* 11, 3413-22.
- Lopes, F.J. *et al.*, 2008. Spatial bistability generates hunchback expression sharpness in the *Drosophila* embryo. *PLoS Comput Biol.* 4, e1000184.
- Lynch, J.A. and Roth, S., 2011. The evolution of dorsal-ventral patterning mechanisms in insects. *Genes Dev.* 25, 107-18.
- Marek, L.R. and Kagan, J.C., 2012. Phosphoinositide binding by the Toll adaptor dMyD88 controls antibacterial responses in *Drosophila*. *Immunity.* 36, 612-22.
- Mitchell, M., 1998. An introduction to genetic algorithms, MIT Press.
- Moussian, B. and Roth, S., 2005. Dorsoventral axis formation in the *Drosophila* embryo--shaping and transducing a morphogen gradient. *Curr Biol.* 15, R887-99.
- O'Connell, M.D. and Reeves, G.T., 2015. The presence of nuclear cactus in the early *Drosophila* embryo may extend the dynamic range of the dorsal gradient. *PLoS Comput Biol.* 11, e1004159.
- O'Dea, E.L. *et al.*, 2007. A homeostatic model of IkappaB metabolism to control constitutive NF-kappaB activity. *Mol Syst Biol.* 3, 111.
- Packman, L.C. *et al.*, 1997. Casein kinase II phosphorylates Ser468 in the PEST domain of the *Drosophila* IkappaB homologue cactus. *FEBS Lett.* 400, 45-50.

- Rao, P. *et al.*, 2010. IkappaBbeta acts to inhibit and activate gene expression during the inflammatory response. *Nature*. 466, 1115-9.
- Ray, R.P. *et al.*, 1991. The control of cell fate along the dorsal-ventral axis of the *Drosophila* embryo. *Development*. 113, 35-54.
- Reach, M. *et al.*, 1996. A gradient of cactus protein degradation establishes dorsoventral polarity in the *Drosophila* embryo. *Dev Biol*. 180, 353-64.
- Reeves, G.T. *et al.*, 2012. Dorsal-ventral gene expression in the *Drosophila* embryo reflects the dynamics and precision of the dorsal nuclear gradient. *Dev Cell*. 22, 544-57.
- Roth, S. *et al.*, 1989. A gradient of nuclear localization of the dorsal protein determines dorsoventral pattern in the *Drosophila* embryo. *Cell*. 59, 1189-202.
- Roth, S. *et al.*, 1991. cactus, a maternal gene required for proper formation of the dorsoventral morphogen gradient in *Drosophila* embryos. *Development*. 112, 371-88.
- Rushlow, C.A. and Shvartsman, S.Y., 2012. Temporal dynamics, spatial range, and transcriptional interpretation of the Dorsal morphogen gradient. *Curr Opin Genet Dev*. 22, 542-6.
- Schaecher, K. *et al.*, 2004. The effects of calpain inhibition on Ikb alpha degradation after activation of PBMCs: identification of the calpain cleavage sites. *Neurochem Res*. 29, 1443-51.
- Shampine, L.F. and Reichelt, M. W., 1997. The MATLAB ODE Suite. *SIAM J. Sci. Comput.*, 18(1), 1-22.
- Shelton, C.A. and Wasserman, S.A., 1993. pelle encodes a protein kinase required to establish dorsoventral polarity in the *Drosophila* embryo. *Cell*. 72, 515-25.
- Shen, J. *et al.*, 2001. Phosphorylation by the protein kinase CK2 promotes calpain-mediated degradation of IkappaBalpha. *J Immunol*. 167, 4919-25.

- Shumway, S.D. *et al.*, 1999. The PEST domain of IkappaBalpha is necessary and sufficient for in vitro degradation by mu-calpain. *J Biol Chem.* 274, 30874-81.
- Stein, D.S. and Stevens, L.M., 2014. Maternal control of the *Drosophila* dorsal-ventral body axis. *Wiley Interdiscip Rev Dev Biol.* 3, 301-30.
- Struhl, G. *et al.*, 1989. The gradient morphogen bicoid is a concentration-dependent transcriptional activator. *Cell.* 57, 1259-73.
- Towb, P. *et al.*, 1998. Recruitment of Tube and Pelle to signaling sites at the surface of the *Drosophila* embryo. *Development.* 125, 2443-50.
- Zeitlinger, J. *et al.*, 2007. RNA polymerase stalling at developmental control genes in the *Drosophila melanogaster* embryo. *Nat Genet.* 39, 1512-6.

## Figures and Tables

Barros *et al.* Figure 1

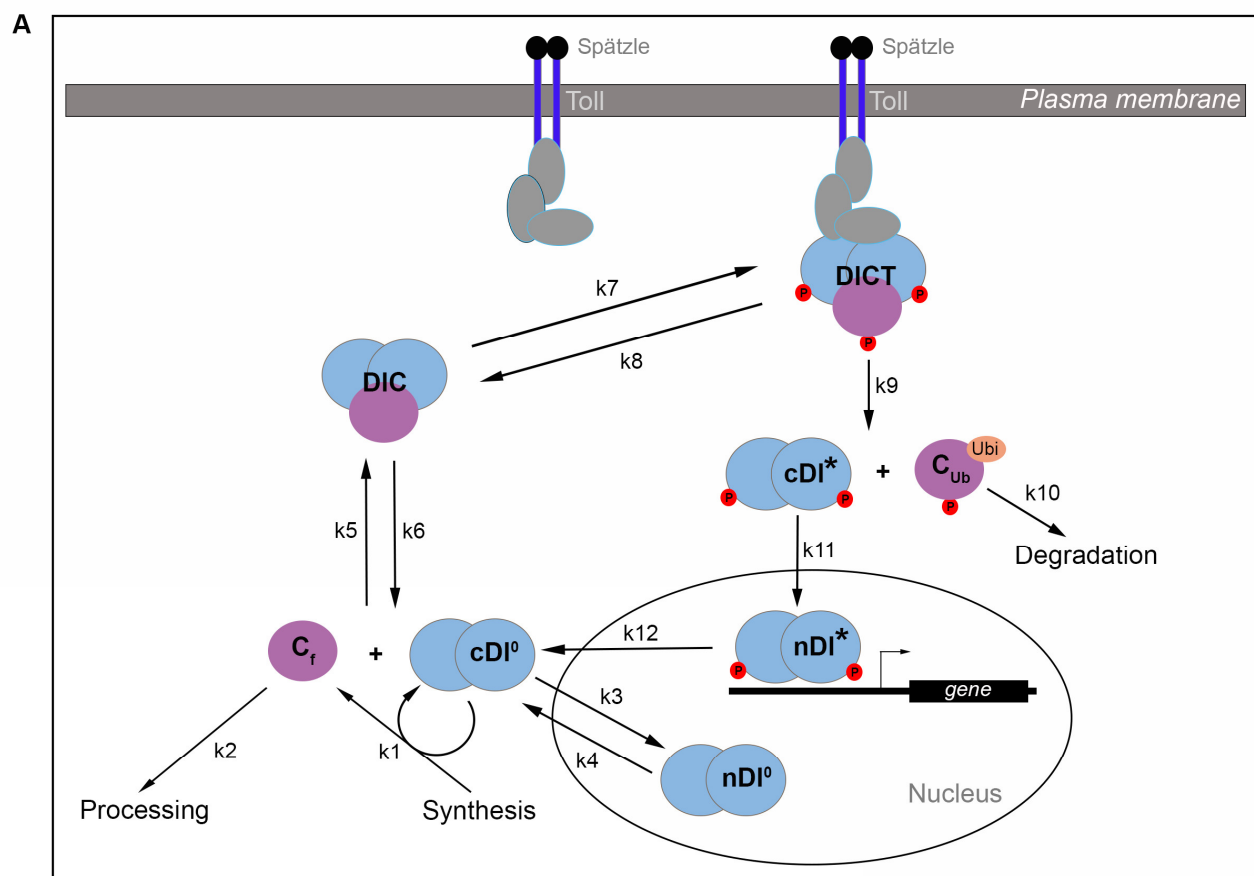

**B**

### Reaction network stoichiometry

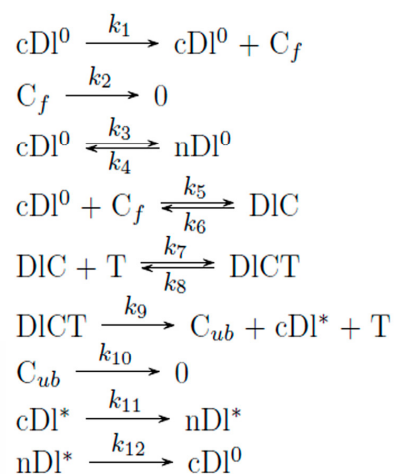

**C**

### Relationship among different species

$$\begin{aligned}
 C &= C_f + DIC + DIC^* + C_{ub} \\
 nDl &= nDl^0 + nDl^* \\
 cDl &= cDl^0 + DIC + DIC^* + cDl^* \\
 Dl &= nDl + cDl \\
 \text{Unbound cDl} &= cDl^0 + cDl^* \\
 \text{Dorsal-Cact Complexes} &= DIC + DIC^*
 \end{aligned}$$

**Figure 1: Mathematical modeling of nuclear Dorsal gradient in *Drosophila* embryos.** (A) Schematic representation of the Reaction-Diffusion Network Model regulating nuclear Dorsal (nDI) localization. Kinetic constants  $k_1$  and  $k_2$  mediate synthesis and degradation of the inhibitor Cactus, respectively. DI dimers can enter and leave the nucleus by direct flow, independently of Toll ( $k_3$  and  $k_4$ ).  $k_5$  and  $k_6$  mediate reversible binding between cytoplasmic DI dimers ( $cDI^0$ ) and free Cactus ( $C_f$ ) to form trimeric complexes (DIC). DICT complex is reversibly formed by interaction between DIC and activated Toll membrane receptor ( $k_7$  and  $k_8$ ). Toll activation induces DI and Cactus phosphorylation, releasing their complexes. This irreversible reaction is controlled by  $k_9$ . Cytoplasmic phosphorylated DI dimers ( $cDI^*$ ) enter the nucleus ( $nDI^*$ ) while phosphorylated and ubiquitinated Cactus ( $C_{ub}$ ) is degraded by the proteasome ( $k_{10}$ ).  $k_{12}$  controls  $nDI^*$  output from the nucleus. T represents activated Toll receptor. (B) Detailed reaction network stoichiometry. (C) Key relationships among model species. Total Cactus (C) is the sum of all species that contain Cactus. Total nuclear Dorsal (nDI) is the sum of  $nDI^0$  and  $nDI^*$ . Total cytoplasmic Dorsal (cDI) includes free  $cDI$ ,  $cDI^*$ , plus the two DIC and DICT complexes. Total Dorsal is the sum of nDI and cDI. Model was solved for cleavage cycle 14 embryos.



Barros *et al.* Figure 2

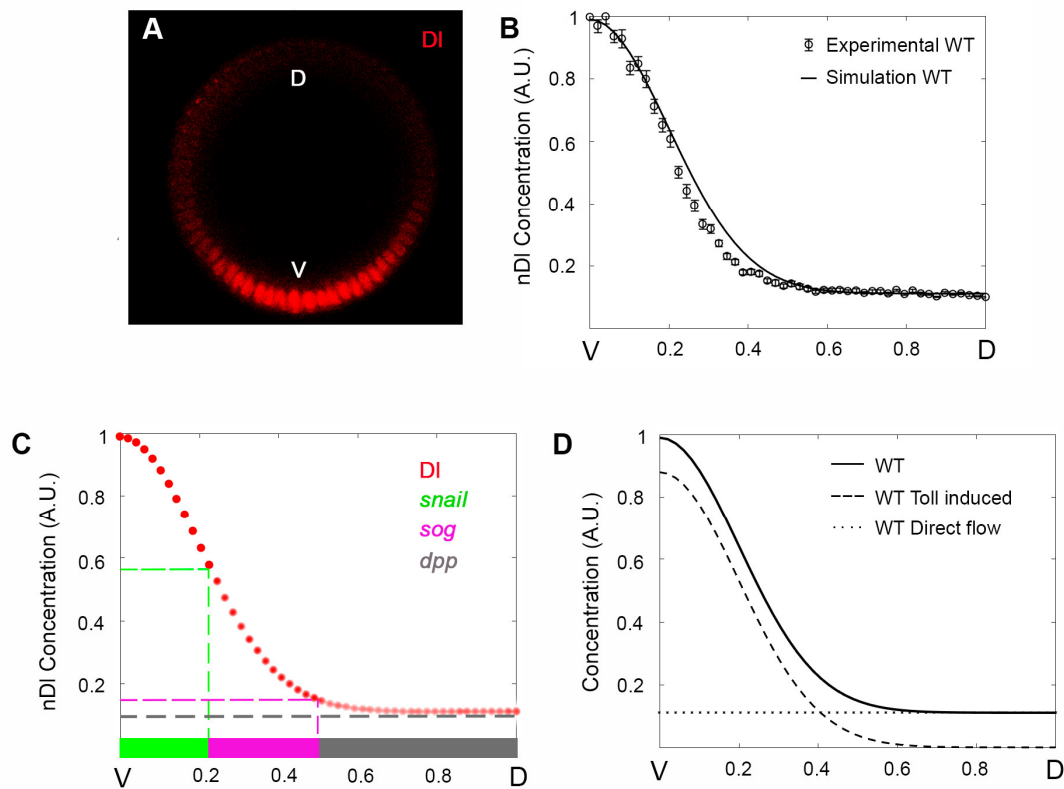

**Figure 2: The Reaction-Diffusion Network Model reproduces the wild type nDI gradient profile and discriminates two different DI nuclear entry modes.** (A) Optical section of a wild type (WT) embryo stained for Dorsal protein. (B) Nuclear DI fluorescence intensity was extracted from sections as in A, measured and plotted as half gradients (circle). The black curve displays model simulation. The y axis represents nDI fluorescence intensity along the ventral-to-dorsal (V-D) embryonic axis (x axis). Data are mean $\pm$ s.e.m. (C) High to low nDI levels (red circles) define different DV territories: ventral mesoderm represented by *snail* expression (green), lateral neuroectoderm represented by *short gastrulation* (*sog*, magenta) and dorsal ectoderm defined by *decapentaplegic* expression (*dpp*, grey). (D) Simulations discriminate nuclear DI that enters the nucleus by direct flow ( $nDI^0$ , dotted curve) or induced by Toll ( $nDI^*$ , dashed curve). Black curve indicates total nDI model simulation, as in B. Ventral (V) region to the left, dorsal (D) to the right.

Barros *et al.* Figure 3

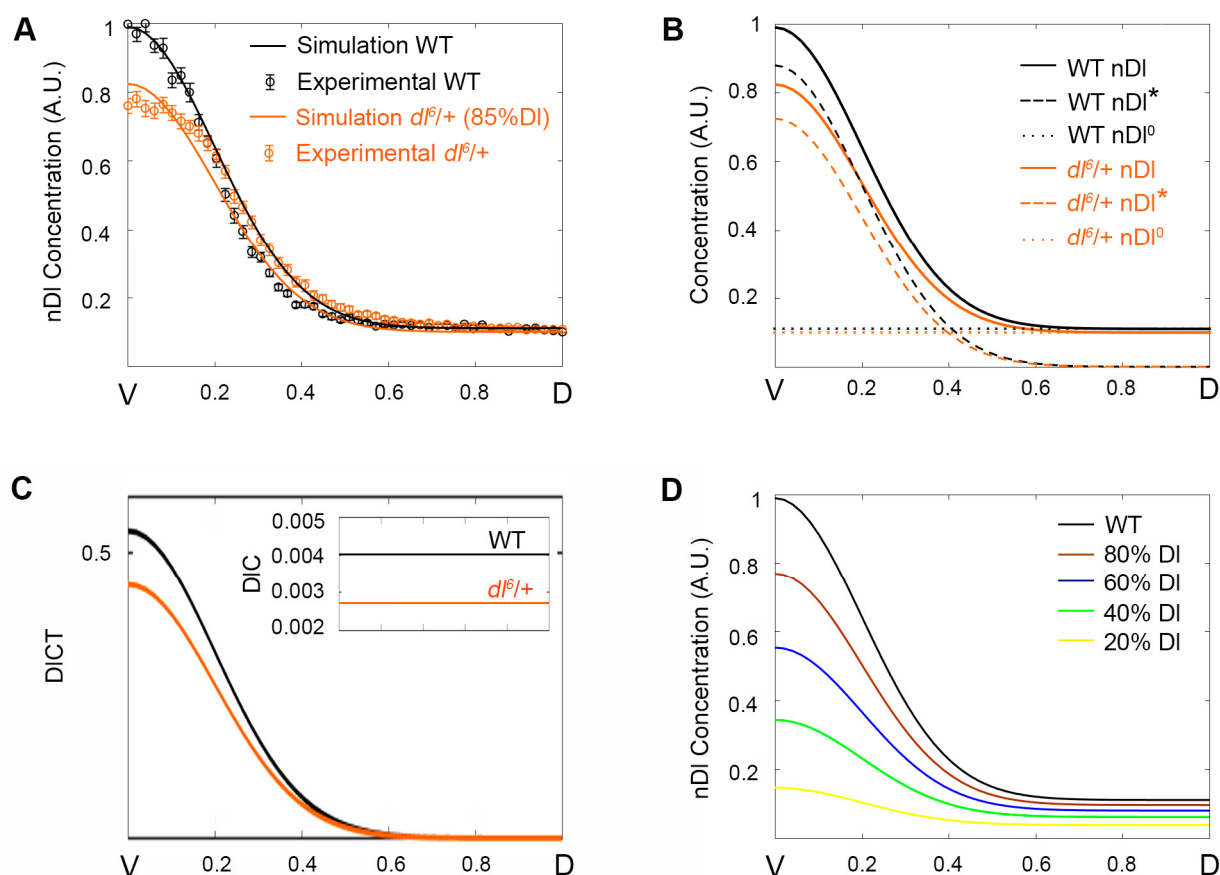

**Figure 3: Model reproduces the nuclear DI gradient in *dl*- mutant embryos.** (A) Simulation (solid curves) and experimental data (circle symbols) from mutant (orange) and wild type (black) embryos were plotted in the same graph. Nuclear DI gradient from *dl*<sup>6/+</sup> mutant embryos are simulated and fitted using an 85% reduction in total Dorsal protein level. (B) Spatial distribution of Dorsal protein that enters the nucleus by direct flow (nDI<sup>0</sup>, dotted curve), or Toll induced (nDI\*, dashed curve) and total nDI. (C) Distribution of DICT and DICT species amounts for wild type (black) and *dl*<sup>6/+</sup> (orange) genotypes. (D) nDI gradient simulations resulting from 20% (yellow), 40% (green), 60% (blue), 80% (brown) Dorsal protein reductions compared to a wild type nDI gradient (black).

Barros et al. Figure 4

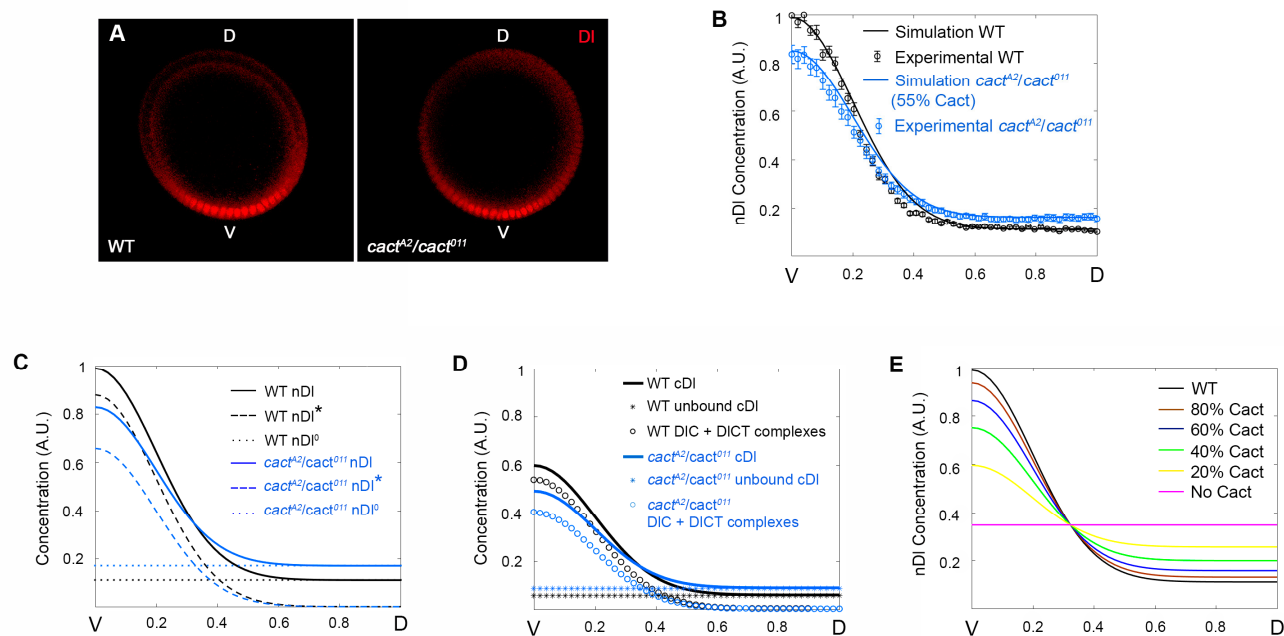

**Figure 4: Cact produces distinct effects along the DV axis by controlling unbound versus complexed DI elements.** (A) Simulations (solid curve) and experimental data (circle symbols) from *cactus* mutant (blue) and wild type (black) embryos. Nuclear DI gradient from *cact<sup>A2/cact<sup>011</sup></sup>* mutant embryos are simulated and fitted using a 55% reduction in Cact protein. (B) Spatial distribution of Dorsal that enters the nucleus by direct flow (nDI<sup>0</sup>, dotted curve), by Toll induced (nDI\*, dashed curve) and total nDI. (C) Distribution of Total cDI (defined as cDI<sup>0</sup> + DIC + DICT + cDI\*; star symbols), sum of the unbound cDI species (cDI<sup>0</sup> + cDI\*) and the DIC + DICT complexes for wild type (black) and *dI<sup>6</sup>/+* (orange) genotypes. (D) nDI gradient simulations resulting from 100% (magenta, constant nDI), 20% (yellow), 40% (green), 60% (blue), 80% (brown) Cactus protein reductions are compared to wild type nDI gradient (black).

Barros *et al.* Figure 5

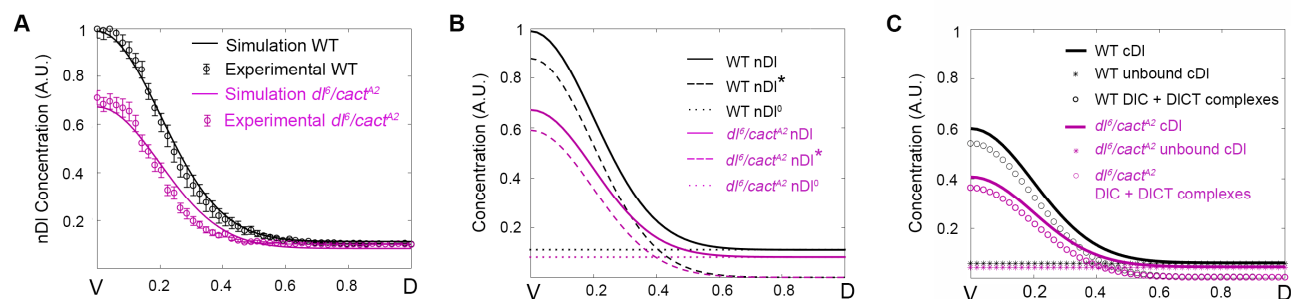

**Figure 5: A *dl/cact* double mutant highlights the positive role of Cact on DI nuclear translocation.** (A) Simulations (solid curves) and experimental data (circle symbols) from mutant (purple) and wild type (black) embryos. Nuclear DI gradients from *dl<sup>6</sup>/cact<sup>A2</sup>* mutant embryos were simulated using simultaneous reduction of 50% Cactus and 70% Dorsal. (B) Spatial distribution of Dorsal that enters the nucleus by direct flow ( $nDI^0$ , dotted curve), by Toll induced ( $nDI^*$ , dashed curve) and total  $nDI$  are shown in wild type (black) and mutant (purple) simulations. (C) Distribution of Total  $cDI$  (defined as  $cDI^0 + DIC + DICT + cDI^*$ ; star symbols), sum of the unbound  $cDI$  species ( $cDI^0 + cDI^*$ ) and the  $DIC + DICT$  complexes for wild type (black) and *dl<sup>6</sup>/cact<sup>A2</sup>* (purple) genotypes.

Barros *et al.* Figure 6

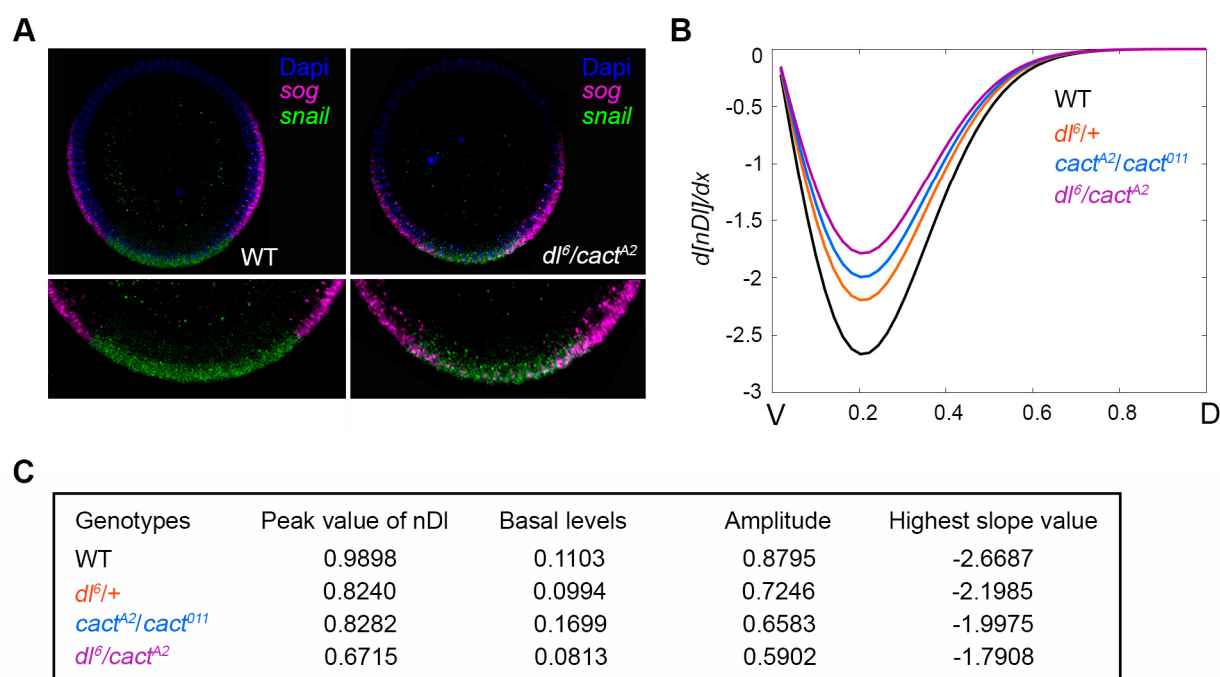

**Figure 6: Variations in nDI gradient slope disrupts the precision of target gene expression DV territories** (A) Cross-sections of wild type (WT) and mutant (*dl<sup>6</sup>/cact<sup>A2</sup>*) cleavage cycle 14 embryos hybridized with *snail* (green) and *sog* (magenta) antisense RNA probes. Nuclei were stained using DAPI (blue). Note *sog* transcripts invading the ventral territory in *dl<sup>6</sup>/cact<sup>A2</sup>* mutants (zoomed images). (B) Derivatives of nDI concentration (y axis) as a function of the position along the embryonic DV axis (x axis) for WT (black), *dl<sup>6</sup>/+* (orange), *dl<sup>6</sup>/cact<sup>A2</sup>* (purple), and *cact<sup>A2</sup>/cact<sup>011</sup>* (blue) mutant embryos. (C) Peak, basal levels, amplitude and highest slope of nDI distribution for each different genetic background.

Barros *et al.* Figure 7

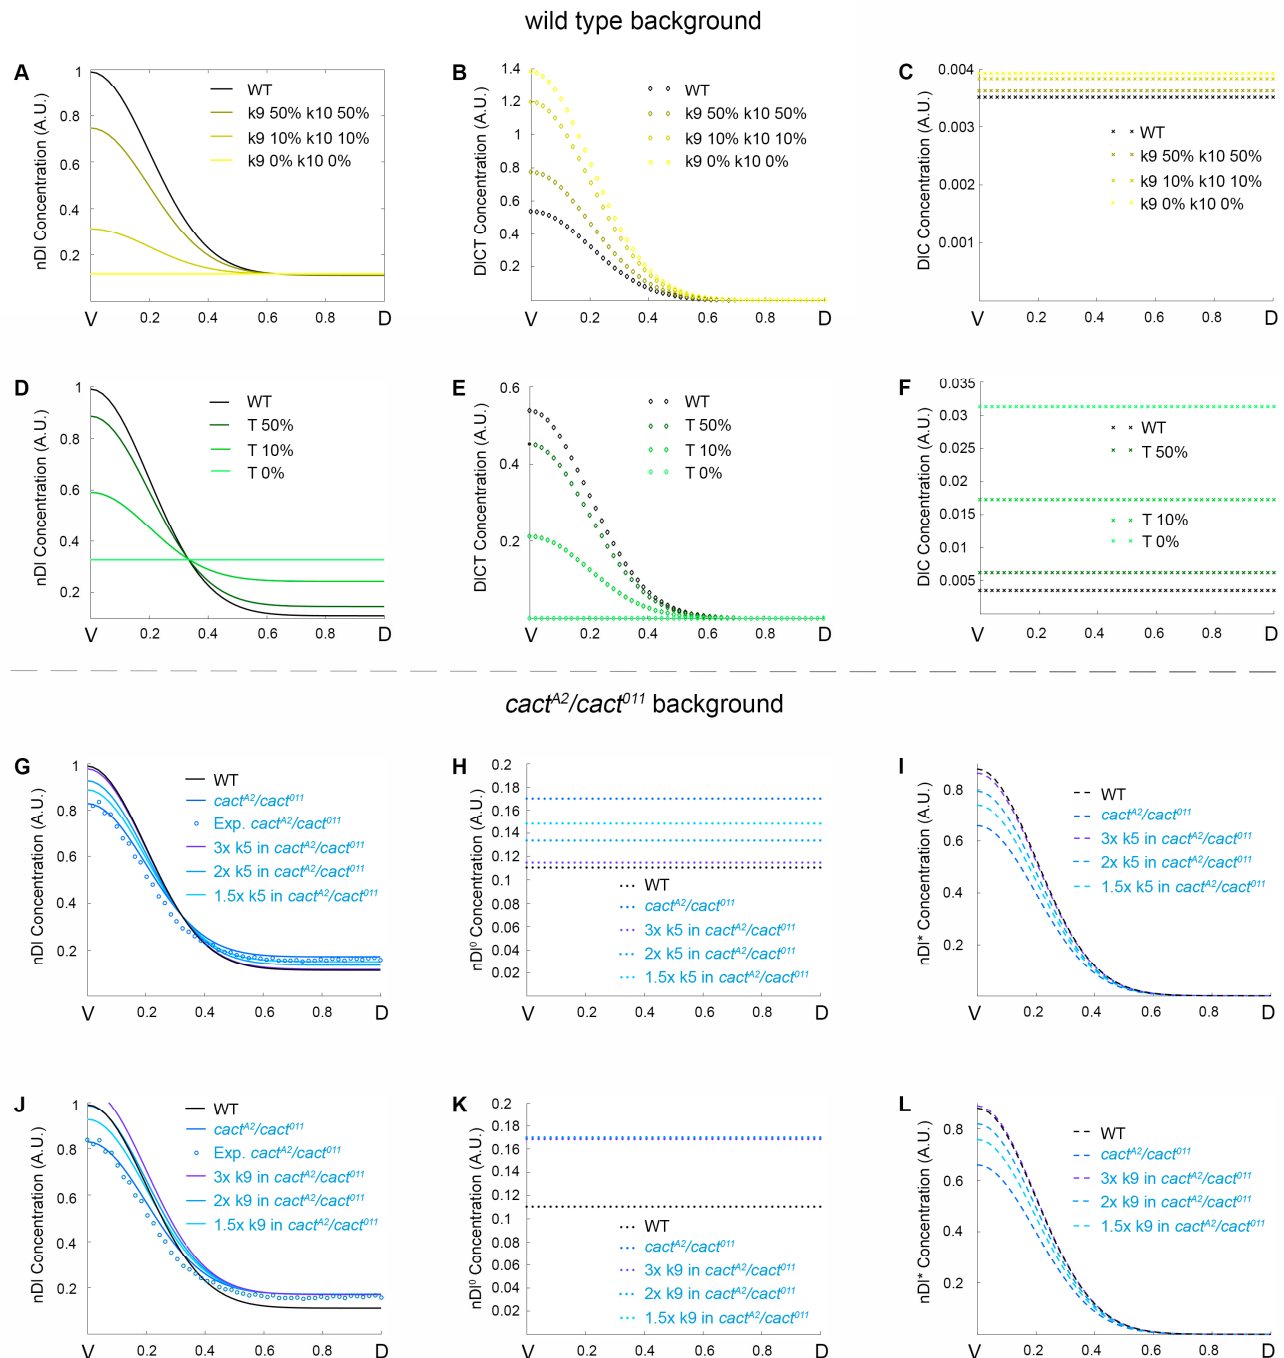

**Figure 7: Model simulations reproduce Toll-dependent and Toll independent pathway mutant conditions.** (A-C) Simulations for simultaneous reduction of kinetic constants k9 and k10 (0%, 10% and 50% reductions), showing the distribution of nuclear Dorsal (A), DICT complex (B) and DIC complex (C). (D-F) Simulations decreasing Toll receptor (T) in 0%, 10%

or 50%, showing the distribution of nuclear Dorsal (D), DICT complex (E) and DIC complex (F). (G-L) Simulations increasing kinetic constant  $k_9$  (G-I) or  $k_5$  (J-L), by 3x, 2x or 1.5x, in a *cact<sup>A2</sup>/cact<sup>011</sup>* mutant background. Shown are nDI (total nuclear Dorsal dimers, G,J), nDI<sup>0</sup> (free nuclear Dorsal dimers; H, K) and nDI\* (nuclear Dorsal dimers activated by Toll Pathway; I, L). G and J also display experimental data from the *cact<sup>A2</sup>/cact<sup>011</sup>* mutant (circles) for comparison with wild type and mutant simulations. All concentrations are plotted along the V-D axis.

Barros *et al.* Table 1

| Nondimensional parameter | Value                 | Nondimensional parameter | Value  |
|--------------------------|-----------------------|--------------------------|--------|
| $[DI]_{tot}$             | 0.525                 | $k_4$                    | 0.0022 |
| $A_{[T]tot}$             | 8.54                  | $k_5$                    | 877    |
| $\sigma_{[T]tot}$        | 0.2822                | $k_6$                    | 7510   |
| $D_{DI}$                 | 91                    | $k_7$                    | 0.113  |
| $D_C$                    | 415                   | $k_8$                    | 0.0023 |
| $D_{DIC}$                | $3.39 \times 10^{-5}$ | $k_9$                    | 0.0036 |
| $k_1$                    | 0.584                 | $k_{10}$                 | 427    |
| $k_2$                    | 0.0610                | $k_{11}$                 | 1.20   |
| $k_3$                    | 0.0043                | $k_{12}$                 | 0.0022 |

**Table 1: Dimensionless model parameters.** Model parameters calibrated to simulate wild-type data. The dimensionless concentrations were obtained by normalizing the experimental data, as described in Methods. Specifically, for DI concentration and peak Toll concentration, normalization is obtained by dividing these values by the experimental nuclear DI concentration in the most ventral region. For quantities involving length, including diffusion coefficients and the width of the Gaussian that represents the Toll activation profile, the total size of the half-embryo was considered to be unitary length (therefore, each compartment is 1/50 in size). For the quantities involving time, such as diffusion coefficients and kinetic constants, the characteristic time was  $T = 1$ .



## Barros *et al.* Table 2

| Genotypes                                   | [DI]tot | k1     | [C]tot |
|---------------------------------------------|---------|--------|--------|
| WT                                          | 0.525   | 0.584  | 100%   |
| <i>dl<sup>6</sup>/+</i>                     | 0.4605  | 0.584  | 90.70% |
| <i>cact<sup>A2</sup>/cact<sup>011</sup></i> | 0.525   | 0.1825 | 53.40% |
| <i>dl<sup>6</sup>/cact<sup>A2</sup></i>     | 0.375   | 0.500  | 71.80% |

**Table 2: Dimensionless parameters for each mutant.** Parameters obtained for each mutant simulated, compared to wild type. Only the changeable values are presented, as all other parameters of the model were kept fixed.
